# Supplementary material for: Flame: an open source framework for model development, hosting, and usage in production environments
Source: PubMed Central journal article supplement (PMC8054391; doi:10.1186/s13321-021-00509-z), 2021-04-19
Supplement: 13321_2021_509_MOESM2_ESM.pdf [file 13321_2021_509_MOESM2_ESM.pdf]

## General model information (FHGGKU7K16)

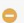[Edit](#)

|                       | Value                                                                                                                                                                                                                                                                                                                                                                                                                                                                                                                                                                                                                                                                                                                                                                                                                  | Description                                       |                        |                                    |                              |                |                                                       |                                      |  |              |                                                                                   |                          |  |               |  |                      |  |              |  |              |  |                   |     |                          |  |                  |  |                  |  |  |
|-----------------------|------------------------------------------------------------------------------------------------------------------------------------------------------------------------------------------------------------------------------------------------------------------------------------------------------------------------------------------------------------------------------------------------------------------------------------------------------------------------------------------------------------------------------------------------------------------------------------------------------------------------------------------------------------------------------------------------------------------------------------------------------------------------------------------------------------------------|---------------------------------------------------|------------------------|------------------------------------|------------------------------|----------------|-------------------------------------------------------|--------------------------------------|--|--------------|-----------------------------------------------------------------------------------|--------------------------|--|---------------|--|----------------------|--|--------------|--|--------------|--|-------------------|-----|--------------------------|--|------------------|--|------------------|--|--|
| ID                    | BZR                                                                                                                                                                                                                                                                                                                                                                                                                                                                                                                                                                                                                                                                                                                                                                                                                    | Model identifier                                  |                        |                                    |                              |                |                                                       |                                      |  |              |                                                                                   |                          |  |               |  |                      |  |              |  |              |  |                   |     |                          |  |                  |  |                  |  |  |
| Version               | Development 27                                                                                                                                                                                                                                                                                                                                                                                                                                                                                                                                                                                                                                                                                                                                                                                                         | Version of the model                              |                        |                                    |                              |                |                                                       |                                      |  |              |                                                                                   |                          |  |               |  |                      |  |              |  |              |  |                   |     |                          |  |                  |  |                  |  |  |
| Contact               | Karolina Kopanska (karolinaweronika.kopanska@upf.edu)                                                                                                                                                                                                                                                                                                                                                                                                                                                                                                                                                                                                                                                                                                                                                                  | Model identifier                                  |                        |                                    |                              |                |                                                       |                                      |  |              |                                                                                   |                          |  |               |  |                      |  |              |  |              |  |                   |     |                          |  |                  |  |                  |  |  |
| Institution           | Universitat Pompeu Fabra (UPF), Research Program on Biomedical Informatics (GRIB), Pharmacoinformatics group (Phi)                                                                                                                                                                                                                                                                                                                                                                                                                                                                                                                                                                                                                                                                                                     | Affiliation details                               |                        |                                    |                              |                |                                                       |                                      |  |              |                                                                                   |                          |  |               |  |                      |  |              |  |              |  |                   |     |                          |  |                  |  |                  |  |  |
| Date                  | 22.07.2020                                                                                                                                                                                                                                                                                                                                                                                                                                                                                                                                                                                                                                                                                                                                                                                                             | Date of model development                         |                        |                                    |                              |                |                                                       |                                      |  |              |                                                                                   |                          |  |               |  |                      |  |              |  |              |  |                   |     |                          |  |                  |  |                  |  |  |
| Endpoint              | Allosteric modulation of benzodiazepine receptor                                                                                                                                                                                                                                                                                                                                                                                                                                                                                                                                                                                                                                                                                                                                                                       | Endpoint modeled                                  |                        |                                    |                              |                |                                                       |                                      |  |              |                                                                                   |                          |  |               |  |                      |  |              |  |              |  |                   |     |                          |  |                  |  |                  |  |  |
| Endpoint units        | Class prediction (active or inactive)                                                                                                                                                                                                                                                                                                                                                                                                                                                                                                                                                                                                                                                                                                                                                                                  | Response units to model                           |                        |                                    |                              |                |                                                       |                                      |  |              |                                                                                   |                          |  |               |  |                      |  |              |  |              |  |                   |     |                          |  |                  |  |                  |  |  |
| Interpretation        | Benzodiazepine receptors are allosteric modulatory sites on GABAA receptors. The effect of the benzodiazepine receptor modulation is the potentiation of the neural inhibition that is mediated by gamma-aminobutyric acid (GABA). The BZR model classifies substances as active or inactive, thereby predicting their physiological effect on the receptor. A positive result indicates that the particular substance was classified as BZR modulator.                                                                                                                                                                                                                                                                                                                                                                | Interpretation of the model                       |                        |                                    |                              |                |                                                       |                                      |  |              |                                                                                   |                          |  |               |  |                      |  |              |  |              |  |                   |     |                          |  |                  |  |                  |  |  |
| Dependent variable    | Activity class membership                                                                                                                                                                                                                                                                                                                                                                                                                                                                                                                                                                                                                                                                                                                                                                                              | Response variable used to model                   |                        |                                    |                              |                |                                                       |                                      |  |              |                                                                                   |                          |  |               |  |                      |  |              |  |              |  |                   |     |                          |  |                  |  |                  |  |  |
| Species               |                                                                                                                                                                                                                                                                                                                                                                                                                                                                                                                                                                                                                                                                                                                                                                                                                        | Modeled endpoint species                          |                        |                                    |                              |                |                                                       |                                      |  |              |                                                                                   |                          |  |               |  |                      |  |              |  |              |  |                   |     |                          |  |                  |  |                  |  |  |
| Limits applicability  |                                                                                                                                                                                                                                                                                                                                                                                                                                                                                                                                                                                                                                                                                                                                                                                                                        | Applicability limits of the model                 |                        |                                    |                              |                |                                                       |                                      |  |              |                                                                                   |                          |  |               |  |                      |  |              |  |              |  |                   |     |                          |  |                  |  |                  |  |  |
| Experimental protocol |                                                                                                                                                                                                                                                                                                                                                                                                                                                                                                                                                                                                                                                                                                                                                                                                                        | Description of the followed experimental protocol |                        |                                    |                              |                |                                                       |                                      |  |              |                                                                                   |                          |  |               |  |                      |  |              |  |              |  |                   |     |                          |  |                  |  |                  |  |  |
| Model availability    | <table border="1"> <tr> <td>description</td> <td>Additional information</td> </tr> <tr> <td>license</td> <td>Model license specifications</td> </tr> <tr> <td>location</td> <td>Model URL/place</td> </tr> </table>                                                                                                                                                                                                                                                                                                                                                                                                                                                                                                                                                                                                    | description                                       | Additional information | license                            | Model license specifications | location       | Model URL/place                                       | Information about model availability |  |              |                                                                                   |                          |  |               |  |                      |  |              |  |              |  |                   |     |                          |  |                  |  |                  |  |  |
| description           | Additional information                                                                                                                                                                                                                                                                                                                                                                                                                                                                                                                                                                                                                                                                                                                                                                                                 |                                                   |                        |                                    |                              |                |                                                       |                                      |  |              |                                                                                   |                          |  |               |  |                      |  |              |  |              |  |                   |     |                          |  |                  |  |                  |  |  |
| license               | Model license specifications                                                                                                                                                                                                                                                                                                                                                                                                                                                                                                                                                                                                                                                                                                                                                                                           |                                                   |                        |                                    |                              |                |                                                       |                                      |  |              |                                                                                   |                          |  |               |  |                      |  |              |  |              |  |                   |     |                          |  |                  |  |                  |  |  |
| location              | Model URL/place                                                                                                                                                                                                                                                                                                                                                                                                                                                                                                                                                                                                                                                                                                                                                                                                        |                                                   |                        |                                    |                              |                |                                                       |                                      |  |              |                                                                                   |                          |  |               |  |                      |  |              |  |              |  |                   |     |                          |  |                  |  |                  |  |  |
| Data info             | <table border="1"> <tr> <td>format</td> <td>SDF</td> <td>Format used (SDF, SMILES, table..)</td> <td>Model data resources</td> </tr> <tr> <td>pre-processing</td> <td>Mol blocks were computed from SMILES using RDKit.Chem</td> <td>Details on data processing</td> <td></td> </tr> <tr> <td>raw data url</td> <td>https://pubs.acs.org/doi/suppl/10.1021/ci5001168/suppl_file/ci5001168_sl_001.xlsx</td> <td>URL of the original data</td> <td></td> </tr> <tr> <td>test set size</td> <td></td> <td>Size of the test set</td> <td></td> </tr> <tr> <td>test set url</td> <td></td> <td>Test set URL</td> <td></td> </tr> <tr> <td>training set size</td> <td>130</td> <td>Size of the training set</td> <td></td> </tr> <tr> <td>training set url</td> <td></td> <td>Training set URL</td> <td></td> </tr> </table> | format                                            | SDF                    | Format used (SDF, SMILES, table..) | Model data resources         | pre-processing | Mol blocks were computed from SMILES using RDKit.Chem | Details on data processing           |  | raw data url | https://pubs.acs.org/doi/suppl/10.1021/ci5001168/suppl_file/ci5001168_sl_001.xlsx | URL of the original data |  | test set size |  | Size of the test set |  | test set url |  | Test set URL |  | training set size | 130 | Size of the training set |  | training set url |  | Training set URL |  |  |
| format                | SDF                                                                                                                                                                                                                                                                                                                                                                                                                                                                                                                                                                                                                                                                                                                                                                                                                    | Format used (SDF, SMILES, table..)                | Model data resources   |                                    |                              |                |                                                       |                                      |  |              |                                                                                   |                          |  |               |  |                      |  |              |  |              |  |                   |     |                          |  |                  |  |                  |  |  |
| pre-processing        | Mol blocks were computed from SMILES using RDKit.Chem                                                                                                                                                                                                                                                                                                                                                                                                                                                                                                                                                                                                                                                                                                                                                                  | Details on data processing                        |                        |                                    |                              |                |                                                       |                                      |  |              |                                                                                   |                          |  |               |  |                      |  |              |  |              |  |                   |     |                          |  |                  |  |                  |  |  |
| raw data url          | https://pubs.acs.org/doi/suppl/10.1021/ci5001168/suppl_file/ci5001168_sl_001.xlsx                                                                                                                                                                                                                                                                                                                                                                                                                                                                                                                                                                                                                                                                                                                                      | URL of the original data                          |                        |                                    |                              |                |                                                       |                                      |  |              |                                                                                   |                          |  |               |  |                      |  |              |  |              |  |                   |     |                          |  |                  |  |                  |  |  |
| test set size         |                                                                                                                                                                                                                                                                                                                                                                                                                                                                                                                                                                                                                                                                                                                                                                                                                        | Size of the test set                              |                        |                                    |                              |                |                                                       |                                      |  |              |                                                                                   |                          |  |               |  |                      |  |              |  |              |  |                   |     |                          |  |                  |  |                  |  |  |
| test set url          |                                                                                                                                                                                                                                                                                                                                                                                                                                                                                                                                                                                                                                                                                                                                                                                                                        | Test set URL                                      |                        |                                    |                              |                |                                                       |                                      |  |              |                                                                                   |                          |  |               |  |                      |  |              |  |              |  |                   |     |                          |  |                  |  |                  |  |  |
| training set size     | 130                                                                                                                                                                                                                                                                                                                                                                                                                                                                                                                                                                                                                                                                                                                                                                                                                    | Size of the training set                          |                        |                                    |                              |                |                                                       |                                      |  |              |                                                                                   |                          |  |               |  |                      |  |              |  |              |  |                   |     |                          |  |                  |  |                  |  |  |
| training set url      |                                                                                                                                                                                                                                                                                                                                                                                                                                                                                                                                                                                                                                                                                                                                                                                                                        | Training set URL                                  |                        |                                    |                              |                |                                                       |                                      |  |              |                                                                                   |                          |  |               |  |                      |  |              |  |              |  |                   |     |                          |  |                  |  |                  |  |  |

## Algorithm and software

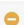[Edit](#)

|                            | Value                                                                                                                                                                                                                                                                                                                                                                                                                                                                                                                                                                                                                                                                                                                                                                                                                                                                                                                                                                                                                                                             | Description                                                             |                                                                                                                                                                                                                                                                                                                                                                                                                                                                                                                                                                                           |                                                                  |                                                                         |                    |                      |                                                                         |  |                |       |                                                           |  |              |      |                           |  |           |   |                                |  |                         |     |                             |  |        |   |    |  |       |      |    |  |        |     |    |  |          |    |    |  |             |      |    |  |              |    |    |  |           |      |    |  |     |       |    |  |         |       |    |  |  |
|----------------------------|-------------------------------------------------------------------------------------------------------------------------------------------------------------------------------------------------------------------------------------------------------------------------------------------------------------------------------------------------------------------------------------------------------------------------------------------------------------------------------------------------------------------------------------------------------------------------------------------------------------------------------------------------------------------------------------------------------------------------------------------------------------------------------------------------------------------------------------------------------------------------------------------------------------------------------------------------------------------------------------------------------------------------------------------------------------------|-------------------------------------------------------------------------|-------------------------------------------------------------------------------------------------------------------------------------------------------------------------------------------------------------------------------------------------------------------------------------------------------------------------------------------------------------------------------------------------------------------------------------------------------------------------------------------------------------------------------------------------------------------------------------------|------------------------------------------------------------------|-------------------------------------------------------------------------|--------------------|----------------------|-------------------------------------------------------------------------|--|----------------|-------|-----------------------------------------------------------|--|--------------|------|---------------------------|--|-----------|---|--------------------------------|--|-------------------------|-----|-----------------------------|--|--------|---|----|--|-------|------|----|--|--------|-----|----|--|----------|----|----|--|-------------|------|----|--|--------------|----|----|--|-----------|------|----|--|-----|-------|----|--|---------|-------|----|--|--|
| Algorithm                  | <table border="1"> <tr> <td>algorithm</td> <td>SVM</td> <td>Type of algorithm (Random Forest, SVM, etc)</td> <td>Description of the algorithm</td> </tr> <tr> <td>descriptors</td> <td>RDKit_properties</td> <td>Name of descriptor package/s used</td> <td></td> </tr> <tr> <td>type</td> <td>QSAR</td> <td>Type of model (QSAR, RA, etc)</td> <td></td> </tr> </table>                                                                                                                                                                                                                                                                                                                                                                                                                                                                                                                                                                                                                                                                                          | algorithm                                                               | SVM                                                                                                                                                                                                                                                                                                                                                                                                                                                                                                                                                                                       | Type of algorithm (Random Forest, SVM, etc)                      | Description of the algorithm                                            | descriptors        | RDKit_properties     | Name of descriptor package/s used                                       |  | type           | QSAR  | Type of model (QSAR, RA, etc)                             |  |              |      |                           |  |           |   |                                |  |                         |     |                             |  |        |   |    |  |       |      |    |  |        |     |    |  |          |    |    |  |             |      |    |  |              |    |    |  |           |      |    |  |     |       |    |  |         |       |    |  |  |
| algorithm                  | SVM                                                                                                                                                                                                                                                                                                                                                                                                                                                                                                                                                                                                                                                                                                                                                                                                                                                                                                                                                                                                                                                               | Type of algorithm (Random Forest, SVM, etc)                             | Description of the algorithm                                                                                                                                                                                                                                                                                                                                                                                                                                                                                                                                                              |                                                                  |                                                                         |                    |                      |                                                                         |  |                |       |                                                           |  |              |      |                           |  |           |   |                                |  |                         |     |                             |  |        |   |    |  |       |      |    |  |        |     |    |  |          |    |    |  |             |      |    |  |              |    |    |  |           |      |    |  |     |       |    |  |         |       |    |  |  |
| descriptors                | RDKit_properties                                                                                                                                                                                                                                                                                                                                                                                                                                                                                                                                                                                                                                                                                                                                                                                                                                                                                                                                                                                                                                                  | Name of descriptor package/s used                                       |                                                                                                                                                                                                                                                                                                                                                                                                                                                                                                                                                                                           |                                                                  |                                                                         |                    |                      |                                                                         |  |                |       |                                                           |  |              |      |                           |  |           |   |                                |  |                         |     |                             |  |        |   |    |  |       |      |    |  |        |     |    |  |          |    |    |  |             |      |    |  |              |    |    |  |           |      |    |  |     |       |    |  |         |       |    |  |  |
| type                       | QSAR                                                                                                                                                                                                                                                                                                                                                                                                                                                                                                                                                                                                                                                                                                                                                                                                                                                                                                                                                                                                                                                              | Type of model (QSAR, RA, etc)                                           |                                                                                                                                                                                                                                                                                                                                                                                                                                                                                                                                                                                           |                                                                  |                                                                         |                    |                      |                                                                         |  |                |       |                                                           |  |              |      |                           |  |           |   |                                |  |                         |     |                             |  |        |   |    |  |       |      |    |  |        |     |    |  |          |    |    |  |             |      |    |  |              |    |    |  |           |      |    |  |     |       |    |  |         |       |    |  |  |
| Software                   | <table border="1"> <tr> <td>applicability domain</td> <td></td> <td>Applicability domain software, version, description and license.</td> <td>Description of the used software</td> </tr> <tr> <td>descriptors</td> <td>RDKit</td> <td>Software used to generate descriptors, version, description and license</td> <td></td> </tr> <tr> <td>model</td> <td>Flame</td> <td>Main modelling program, version, description and license.</td> <td></td> </tr> </table>                                                                                                                                                                                                                                                                                                                                                                                                                                                                                                                                                                                                | applicability domain                                                    |                                                                                                                                                                                                                                                                                                                                                                                                                                                                                                                                                                                           | Applicability domain software, version, description and license. | Description of the used software                                        | descriptors        | RDKit                | Software used to generate descriptors, version, description and license |  | model          | Flame | Main modelling program, version, description and license. |  |              |      |                           |  |           |   |                                |  |                         |     |                             |  |        |   |    |  |       |      |    |  |        |     |    |  |          |    |    |  |             |      |    |  |              |    |    |  |           |      |    |  |     |       |    |  |         |       |    |  |  |
| applicability domain       |                                                                                                                                                                                                                                                                                                                                                                                                                                                                                                                                                                                                                                                                                                                                                                                                                                                                                                                                                                                                                                                                   | Applicability domain software, version, description and license.        | Description of the used software                                                                                                                                                                                                                                                                                                                                                                                                                                                                                                                                                          |                                                                  |                                                                         |                    |                      |                                                                         |  |                |       |                                                           |  |              |      |                           |  |           |   |                                |  |                         |     |                             |  |        |   |    |  |       |      |    |  |        |     |    |  |          |    |    |  |             |      |    |  |              |    |    |  |           |      |    |  |     |       |    |  |         |       |    |  |  |
| descriptors                | RDKit                                                                                                                                                                                                                                                                                                                                                                                                                                                                                                                                                                                                                                                                                                                                                                                                                                                                                                                                                                                                                                                             | Software used to generate descriptors, version, description and license |                                                                                                                                                                                                                                                                                                                                                                                                                                                                                                                                                                                           |                                                                  |                                                                         |                    |                      |                                                                         |  |                |       |                                                           |  |              |      |                           |  |           |   |                                |  |                         |     |                             |  |        |   |    |  |       |      |    |  |        |     |    |  |          |    |    |  |             |      |    |  |              |    |    |  |           |      |    |  |     |       |    |  |         |       |    |  |  |
| model                      | Flame                                                                                                                                                                                                                                                                                                                                                                                                                                                                                                                                                                                                                                                                                                                                                                                                                                                                                                                                                                                                                                                             | Main modelling program, version, description and license.               |                                                                                                                                                                                                                                                                                                                                                                                                                                                                                                                                                                                           |                                                                  |                                                                         |                    |                      |                                                                         |  |                |       |                                                           |  |              |      |                           |  |           |   |                                |  |                         |     |                             |  |        |   |    |  |       |      |    |  |        |     |    |  |          |    |    |  |             |      |    |  |              |    |    |  |           |      |    |  |     |       |    |  |         |       |    |  |  |
| Descriptors                | <table border="1"> <tr> <td>descriptors</td> <td></td> <td>Descriptors used, list</td> <td>Information on descriptors used for the model</td> </tr> <tr> <td>final number</td> <td>25</td> <td>Final number of descriptors after feature selection</td> <td></td> </tr> <tr> <td>initial number</td> <td></td> <td>Initial number of descriptors</td> <td></td> </tr> <tr> <td>ratio</td> <td>0.19</td> <td>Ratio samples/descriptors</td> <td></td> </tr> <tr> <td>selection</td> <td></td> <td>Final list of descriptors used</td> <td></td> </tr> <tr> <td>selection method</td> <td></td> <td>Feature selection technique</td> <td></td> </tr> </table>                                                                                                                                                                                                                                                                                                                                                                                                       | descriptors                                                             |                                                                                                                                                                                                                                                                                                                                                                                                                                                                                                                                                                                           | Descriptors used, list                                           | Information on descriptors used for the model                           | final number       | 25                   | Final number of descriptors after feature selection                     |  | initial number |       | Initial number of descriptors                             |  | ratio        | 0.19 | Ratio samples/descriptors |  | selection |   | Final list of descriptors used |  | selection method        |     | Feature selection technique |  |        |   |    |  |       |      |    |  |        |     |    |  |          |    |    |  |             |      |    |  |              |    |    |  |           |      |    |  |     |       |    |  |         |       |    |  |  |
| descriptors                |                                                                                                                                                                                                                                                                                                                                                                                                                                                                                                                                                                                                                                                                                                                                                                                                                                                                                                                                                                                                                                                                   | Descriptors used, list                                                  | Information on descriptors used for the model                                                                                                                                                                                                                                                                                                                                                                                                                                                                                                                                             |                                                                  |                                                                         |                    |                      |                                                                         |  |                |       |                                                           |  |              |      |                           |  |           |   |                                |  |                         |     |                             |  |        |   |    |  |       |      |    |  |        |     |    |  |          |    |    |  |             |      |    |  |              |    |    |  |           |      |    |  |     |       |    |  |         |       |    |  |  |
| final number               | 25                                                                                                                                                                                                                                                                                                                                                                                                                                                                                                                                                                                                                                                                                                                                                                                                                                                                                                                                                                                                                                                                | Final number of descriptors after feature selection                     |                                                                                                                                                                                                                                                                                                                                                                                                                                                                                                                                                                                           |                                                                  |                                                                         |                    |                      |                                                                         |  |                |       |                                                           |  |              |      |                           |  |           |   |                                |  |                         |     |                             |  |        |   |    |  |       |      |    |  |        |     |    |  |          |    |    |  |             |      |    |  |              |    |    |  |           |      |    |  |     |       |    |  |         |       |    |  |  |
| initial number             |                                                                                                                                                                                                                                                                                                                                                                                                                                                                                                                                                                                                                                                                                                                                                                                                                                                                                                                                                                                                                                                                   | Initial number of descriptors                                           |                                                                                                                                                                                                                                                                                                                                                                                                                                                                                                                                                                                           |                                                                  |                                                                         |                    |                      |                                                                         |  |                |       |                                                           |  |              |      |                           |  |           |   |                                |  |                         |     |                             |  |        |   |    |  |       |      |    |  |        |     |    |  |          |    |    |  |             |      |    |  |              |    |    |  |           |      |    |  |     |       |    |  |         |       |    |  |  |
| ratio                      | 0.19                                                                                                                                                                                                                                                                                                                                                                                                                                                                                                                                                                                                                                                                                                                                                                                                                                                                                                                                                                                                                                                              | Ratio samples/descriptors                                               |                                                                                                                                                                                                                                                                                                                                                                                                                                                                                                                                                                                           |                                                                  |                                                                         |                    |                      |                                                                         |  |                |       |                                                           |  |              |      |                           |  |           |   |                                |  |                         |     |                             |  |        |   |    |  |       |      |    |  |        |     |    |  |          |    |    |  |             |      |    |  |              |    |    |  |           |      |    |  |     |       |    |  |         |       |    |  |  |
| selection                  |                                                                                                                                                                                                                                                                                                                                                                                                                                                                                                                                                                                                                                                                                                                                                                                                                                                                                                                                                                                                                                                                   | Final list of descriptors used                                          |                                                                                                                                                                                                                                                                                                                                                                                                                                                                                                                                                                                           |                                                                  |                                                                         |                    |                      |                                                                         |  |                |       |                                                           |  |              |      |                           |  |           |   |                                |  |                         |     |                             |  |        |   |    |  |       |      |    |  |        |     |    |  |          |    |    |  |             |      |    |  |              |    |    |  |           |      |    |  |     |       |    |  |         |       |    |  |  |
| selection method           |                                                                                                                                                                                                                                                                                                                                                                                                                                                                                                                                                                                                                                                                                                                                                                                                                                                                                                                                                                                                                                                                   | Feature selection technique                                             |                                                                                                                                                                                                                                                                                                                                                                                                                                                                                                                                                                                           |                                                                  |                                                                         |                    |                      |                                                                         |  |                |       |                                                           |  |              |      |                           |  |           |   |                                |  |                         |     |                             |  |        |   |    |  |       |      |    |  |        |     |    |  |          |    |    |  |             |      |    |  |              |    |    |  |           |      |    |  |     |       |    |  |         |       |    |  |  |
| Algorithm settings         | <table border="1"> <tr> <td>C</td> <td>1</td> <td>na</td> <td>Algorithm parameters information</td> </tr> <tr> <td>break ties</td> <td>false</td> <td>na</td> <td></td> </tr> <tr> <td>cache size</td> <td>200</td> <td>na</td> <td></td> </tr> <tr> <td>class weight</td> <td></td> <td>na</td> <td></td> </tr> <tr> <td>coef0</td> <td>0</td> <td>na</td> <td></td> </tr> <tr> <td>decision function shape</td> <td>ovr</td> <td>na</td> <td></td> </tr> <tr> <td>degree</td> <td>3</td> <td>na</td> <td></td> </tr> <tr> <td>gamma</td> <td>auto</td> <td>na</td> <td></td> </tr> <tr> <td>kernel</td> <td>rbf</td> <td>na</td> <td></td> </tr> <tr> <td>max iter</td> <td>-1</td> <td>na</td> <td></td> </tr> <tr> <td>probability</td> <td>true</td> <td>na</td> <td></td> </tr> <tr> <td>random state</td> <td>46</td> <td>na</td> <td></td> </tr> <tr> <td>shrinking</td> <td>true</td> <td>na</td> <td></td> </tr> <tr> <td>tol</td> <td>0.001</td> <td>na</td> <td></td> </tr> <tr> <td>verbose</td> <td>false</td> <td>na</td> <td></td> </tr> </table> | C                                                                       | 1                                                                                                                                                                                                                                                                                                                                                                                                                                                                                                                                                                                         | na                                                               | Algorithm parameters information                                        | break ties         | false                | na                                                                      |  | cache size     | 200   | na                                                        |  | class weight |      | na                        |  | coef0     | 0 | na                             |  | decision function shape | ovr | na                          |  | degree | 3 | na |  | gamma | auto | na |  | kernel | rbf | na |  | max iter | -1 | na |  | probability | true | na |  | random state | 46 | na |  | shrinking | true | na |  | tol | 0.001 | na |  | verbose | false | na |  |  |
| C                          | 1                                                                                                                                                                                                                                                                                                                                                                                                                                                                                                                                                                                                                                                                                                                                                                                                                                                                                                                                                                                                                                                                 | na                                                                      | Algorithm parameters information                                                                                                                                                                                                                                                                                                                                                                                                                                                                                                                                                          |                                                                  |                                                                         |                    |                      |                                                                         |  |                |       |                                                           |  |              |      |                           |  |           |   |                                |  |                         |     |                             |  |        |   |    |  |       |      |    |  |        |     |    |  |          |    |    |  |             |      |    |  |              |    |    |  |           |      |    |  |     |       |    |  |         |       |    |  |  |
| break ties                 | false                                                                                                                                                                                                                                                                                                                                                                                                                                                                                                                                                                                                                                                                                                                                                                                                                                                                                                                                                                                                                                                             | na                                                                      |                                                                                                                                                                                                                                                                                                                                                                                                                                                                                                                                                                                           |                                                                  |                                                                         |                    |                      |                                                                         |  |                |       |                                                           |  |              |      |                           |  |           |   |                                |  |                         |     |                             |  |        |   |    |  |       |      |    |  |        |     |    |  |          |    |    |  |             |      |    |  |              |    |    |  |           |      |    |  |     |       |    |  |         |       |    |  |  |
| cache size                 | 200                                                                                                                                                                                                                                                                                                                                                                                                                                                                                                                                                                                                                                                                                                                                                                                                                                                                                                                                                                                                                                                               | na                                                                      |                                                                                                                                                                                                                                                                                                                                                                                                                                                                                                                                                                                           |                                                                  |                                                                         |                    |                      |                                                                         |  |                |       |                                                           |  |              |      |                           |  |           |   |                                |  |                         |     |                             |  |        |   |    |  |       |      |    |  |        |     |    |  |          |    |    |  |             |      |    |  |              |    |    |  |           |      |    |  |     |       |    |  |         |       |    |  |  |
| class weight               |                                                                                                                                                                                                                                                                                                                                                                                                                                                                                                                                                                                                                                                                                                                                                                                                                                                                                                                                                                                                                                                                   | na                                                                      |                                                                                                                                                                                                                                                                                                                                                                                                                                                                                                                                                                                           |                                                                  |                                                                         |                    |                      |                                                                         |  |                |       |                                                           |  |              |      |                           |  |           |   |                                |  |                         |     |                             |  |        |   |    |  |       |      |    |  |        |     |    |  |          |    |    |  |             |      |    |  |              |    |    |  |           |      |    |  |     |       |    |  |         |       |    |  |  |
| coef0                      | 0                                                                                                                                                                                                                                                                                                                                                                                                                                                                                                                                                                                                                                                                                                                                                                                                                                                                                                                                                                                                                                                                 | na                                                                      |                                                                                                                                                                                                                                                                                                                                                                                                                                                                                                                                                                                           |                                                                  |                                                                         |                    |                      |                                                                         |  |                |       |                                                           |  |              |      |                           |  |           |   |                                |  |                         |     |                             |  |        |   |    |  |       |      |    |  |        |     |    |  |          |    |    |  |             |      |    |  |              |    |    |  |           |      |    |  |     |       |    |  |         |       |    |  |  |
| decision function shape    | ovr                                                                                                                                                                                                                                                                                                                                                                                                                                                                                                                                                                                                                                                                                                                                                                                                                                                                                                                                                                                                                                                               | na                                                                      |                                                                                                                                                                                                                                                                                                                                                                                                                                                                                                                                                                                           |                                                                  |                                                                         |                    |                      |                                                                         |  |                |       |                                                           |  |              |      |                           |  |           |   |                                |  |                         |     |                             |  |        |   |    |  |       |      |    |  |        |     |    |  |          |    |    |  |             |      |    |  |              |    |    |  |           |      |    |  |     |       |    |  |         |       |    |  |  |
| degree                     | 3                                                                                                                                                                                                                                                                                                                                                                                                                                                                                                                                                                                                                                                                                                                                                                                                                                                                                                                                                                                                                                                                 | na                                                                      |                                                                                                                                                                                                                                                                                                                                                                                                                                                                                                                                                                                           |                                                                  |                                                                         |                    |                      |                                                                         |  |                |       |                                                           |  |              |      |                           |  |           |   |                                |  |                         |     |                             |  |        |   |    |  |       |      |    |  |        |     |    |  |          |    |    |  |             |      |    |  |              |    |    |  |           |      |    |  |     |       |    |  |         |       |    |  |  |
| gamma                      | auto                                                                                                                                                                                                                                                                                                                                                                                                                                                                                                                                                                                                                                                                                                                                                                                                                                                                                                                                                                                                                                                              | na                                                                      |                                                                                                                                                                                                                                                                                                                                                                                                                                                                                                                                                                                           |                                                                  |                                                                         |                    |                      |                                                                         |  |                |       |                                                           |  |              |      |                           |  |           |   |                                |  |                         |     |                             |  |        |   |    |  |       |      |    |  |        |     |    |  |          |    |    |  |             |      |    |  |              |    |    |  |           |      |    |  |     |       |    |  |         |       |    |  |  |
| kernel                     | rbf                                                                                                                                                                                                                                                                                                                                                                                                                                                                                                                                                                                                                                                                                                                                                                                                                                                                                                                                                                                                                                                               | na                                                                      |                                                                                                                                                                                                                                                                                                                                                                                                                                                                                                                                                                                           |                                                                  |                                                                         |                    |                      |                                                                         |  |                |       |                                                           |  |              |      |                           |  |           |   |                                |  |                         |     |                             |  |        |   |    |  |       |      |    |  |        |     |    |  |          |    |    |  |             |      |    |  |              |    |    |  |           |      |    |  |     |       |    |  |         |       |    |  |  |
| max iter                   | -1                                                                                                                                                                                                                                                                                                                                                                                                                                                                                                                                                                                                                                                                                                                                                                                                                                                                                                                                                                                                                                                                | na                                                                      |                                                                                                                                                                                                                                                                                                                                                                                                                                                                                                                                                                                           |                                                                  |                                                                         |                    |                      |                                                                         |  |                |       |                                                           |  |              |      |                           |  |           |   |                                |  |                         |     |                             |  |        |   |    |  |       |      |    |  |        |     |    |  |          |    |    |  |             |      |    |  |              |    |    |  |           |      |    |  |     |       |    |  |         |       |    |  |  |
| probability                | true                                                                                                                                                                                                                                                                                                                                                                                                                                                                                                                                                                                                                                                                                                                                                                                                                                                                                                                                                                                                                                                              | na                                                                      |                                                                                                                                                                                                                                                                                                                                                                                                                                                                                                                                                                                           |                                                                  |                                                                         |                    |                      |                                                                         |  |                |       |                                                           |  |              |      |                           |  |           |   |                                |  |                         |     |                             |  |        |   |    |  |       |      |    |  |        |     |    |  |          |    |    |  |             |      |    |  |              |    |    |  |           |      |    |  |     |       |    |  |         |       |    |  |  |
| random state               | 46                                                                                                                                                                                                                                                                                                                                                                                                                                                                                                                                                                                                                                                                                                                                                                                                                                                                                                                                                                                                                                                                | na                                                                      |                                                                                                                                                                                                                                                                                                                                                                                                                                                                                                                                                                                           |                                                                  |                                                                         |                    |                      |                                                                         |  |                |       |                                                           |  |              |      |                           |  |           |   |                                |  |                         |     |                             |  |        |   |    |  |       |      |    |  |        |     |    |  |          |    |    |  |             |      |    |  |              |    |    |  |           |      |    |  |     |       |    |  |         |       |    |  |  |
| shrinking                  | true                                                                                                                                                                                                                                                                                                                                                                                                                                                                                                                                                                                                                                                                                                                                                                                                                                                                                                                                                                                                                                                              | na                                                                      |                                                                                                                                                                                                                                                                                                                                                                                                                                                                                                                                                                                           |                                                                  |                                                                         |                    |                      |                                                                         |  |                |       |                                                           |  |              |      |                           |  |           |   |                                |  |                         |     |                             |  |        |   |    |  |       |      |    |  |        |     |    |  |          |    |    |  |             |      |    |  |              |    |    |  |           |      |    |  |     |       |    |  |         |       |    |  |  |
| tol                        | 0.001                                                                                                                                                                                                                                                                                                                                                                                                                                                                                                                                                                                                                                                                                                                                                                                                                                                                                                                                                                                                                                                             | na                                                                      |                                                                                                                                                                                                                                                                                                                                                                                                                                                                                                                                                                                           |                                                                  |                                                                         |                    |                      |                                                                         |  |                |       |                                                           |  |              |      |                           |  |           |   |                                |  |                         |     |                             |  |        |   |    |  |       |      |    |  |        |     |    |  |          |    |    |  |             |      |    |  |              |    |    |  |           |      |    |  |     |       |    |  |         |       |    |  |  |
| verbose                    | false                                                                                                                                                                                                                                                                                                                                                                                                                                                                                                                                                                                                                                                                                                                                                                                                                                                                                                                                                                                                                                                             | na                                                                      |                                                                                                                                                                                                                                                                                                                                                                                                                                                                                                                                                                                           |                                                                  |                                                                         |                    |                      |                                                                         |  |                |       |                                                           |  |              |      |                           |  |           |   |                                |  |                         |     |                             |  |        |   |    |  |       |      |    |  |        |     |    |  |          |    |    |  |             |      |    |  |              |    |    |  |           |      |    |  |     |       |    |  |         |       |    |  |  |
| AD method                  | <table border="1"> <tr> <td>description</td> <td>Adding conformal features to the classifier guarantees both, a certain level of confidence and a maximum frequency of errors (misclassifications) which will be committed by the conformal predictor. The given confidence level opposes the error rate which represents the level of uncertainty that must initially be accepted and provided by the user. Conformal accuracy indicates the fraction of correct predictions at the given confidence level. Conformal coverage is the fraction of substances for which valid predictions were generated at the required confidence level.</td> <td>Description of the applicability domain technique</td> <td>Applicability domain technique details</td> </tr> <tr> <td>name</td> <td>conformal prediction</td> <td>Name of the applicability domain technique</td> <td></td> </tr> </table>                                                                                                                                                                    | description                                                             | Adding conformal features to the classifier guarantees both, a certain level of confidence and a maximum frequency of errors (misclassifications) which will be committed by the conformal predictor. The given confidence level opposes the error rate which represents the level of uncertainty that must initially be accepted and provided by the user. Conformal accuracy indicates the fraction of correct predictions at the given confidence level. Conformal coverage is the fraction of substances for which valid predictions were generated at the required confidence level. | Description of the applicability domain technique                | Applicability domain technique details                                  | name               | conformal prediction | Name of the applicability domain technique                              |  |                |       |                                                           |  |              |      |                           |  |           |   |                                |  |                         |     |                             |  |        |   |    |  |       |      |    |  |        |     |    |  |          |    |    |  |             |      |    |  |              |    |    |  |           |      |    |  |     |       |    |  |         |       |    |  |  |
| description                | Adding conformal features to the classifier guarantees both, a certain level of confidence and a maximum frequency of errors (misclassifications) which will be committed by the conformal predictor. The given confidence level opposes the error rate which represents the level of uncertainty that must initially be accepted and provided by the user. Conformal accuracy indicates the fraction of correct predictions at the given confidence level. Conformal coverage is the fraction of substances for which valid predictions were generated at the required confidence level.                                                                                                                                                                                                                                                                                                                                                                                                                                                                         | Description of the applicability domain technique                       | Applicability domain technique details                                                                                                                                                                                                                                                                                                                                                                                                                                                                                                                                                    |                                                                  |                                                                         |                    |                      |                                                                         |  |                |       |                                                           |  |              |      |                           |  |           |   |                                |  |                         |     |                             |  |        |   |    |  |       |      |    |  |        |     |    |  |          |    |    |  |             |      |    |  |              |    |    |  |           |      |    |  |     |       |    |  |         |       |    |  |  |
| name                       | conformal prediction                                                                                                                                                                                                                                                                                                                                                                                                                                                                                                                                                                                                                                                                                                                                                                                                                                                                                                                                                                                                                                              | Name of the applicability domain technique                              |                                                                                                                                                                                                                                                                                                                                                                                                                                                                                                                                                                                           |                                                                  |                                                                         |                    |                      |                                                                         |  |                |       |                                                           |  |              |      |                           |  |           |   |                                |  |                         |     |                             |  |        |   |    |  |       |      |    |  |        |     |    |  |          |    |    |  |             |      |    |  |              |    |    |  |           |      |    |  |     |       |    |  |         |       |    |  |  |
| AD parameters              | <table border="1"> <tr> <td>confidence</td> <td>0.8</td> <td>Conformal confidence (from 0 to 1)</td> <td>Parameters of the applicability domain technique</td> </tr> </table>                                                                                                                                                                                                                                                                                                                                                                                                                                                                                                                                                                                                                                                                                                                                                                                                                                                                                     | confidence                                                              | 0.8                                                                                                                                                                                                                                                                                                                                                                                                                                                                                                                                                                                       | Conformal confidence (from 0 to 1)                               | Parameters of the applicability domain technique                        |                    |                      |                                                                         |  |                |       |                                                           |  |              |      |                           |  |           |   |                                |  |                         |     |                             |  |        |   |    |  |       |      |    |  |        |     |    |  |          |    |    |  |             |      |    |  |              |    |    |  |           |      |    |  |     |       |    |  |         |       |    |  |  |
| confidence                 | 0.8                                                                                                                                                                                                                                                                                                                                                                                                                                                                                                                                                                                                                                                                                                                                                                                                                                                                                                                                                                                                                                                               | Conformal confidence (from 0 to 1)                                      | Parameters of the applicability domain technique                                                                                                                                                                                                                                                                                                                                                                                                                                                                                                                                          |                                                                  |                                                                         |                    |                      |                                                                         |  |                |       |                                                           |  |              |      |                           |  |           |   |                                |  |                         |     |                             |  |        |   |    |  |       |      |    |  |        |     |    |  |          |    |    |  |             |      |    |  |              |    |    |  |           |      |    |  |     |       |    |  |         |       |    |  |  |
| Goodness of fit statistics | <table border="1"> <tr> <td>Specificity</td> <td>0.83</td> <td>na</td> <td>Goodness of fit statistics</td> </tr> <tr> <td>MCC</td> <td>0.61</td> <td>na</td> <td></td> </tr> </table>                                                                                                                                                                                                                                                                                                                                                                                                                                                                                                                                                                                                                                                                                                                                                                                                                                                                             | Specificity                                                             | 0.83                                                                                                                                                                                                                                                                                                                                                                                                                                                                                                                                                                                      | na                                                               | Goodness of fit statistics                                              | MCC                | 0.61                 | na                                                                      |  |                |       |                                                           |  |              |      |                           |  |           |   |                                |  |                         |     |                             |  |        |   |    |  |       |      |    |  |        |     |    |  |          |    |    |  |             |      |    |  |              |    |    |  |           |      |    |  |     |       |    |  |         |       |    |  |  |
| Specificity                | 0.83                                                                                                                                                                                                                                                                                                                                                                                                                                                                                                                                                                                                                                                                                                                                                                                                                                                                                                                                                                                                                                                              | na                                                                      | Goodness of fit statistics                                                                                                                                                                                                                                                                                                                                                                                                                                                                                                                                                                |                                                                  |                                                                         |                    |                      |                                                                         |  |                |       |                                                           |  |              |      |                           |  |           |   |                                |  |                         |     |                             |  |        |   |    |  |       |      |    |  |        |     |    |  |          |    |    |  |             |      |    |  |              |    |    |  |           |      |    |  |     |       |    |  |         |       |    |  |  |
| MCC                        | 0.61                                                                                                                                                                                                                                                                                                                                                                                                                                                                                                                                                                                                                                                                                                                                                                                                                                                                                                                                                                                                                                                              | na                                                                      |                                                                                                                                                                                                                                                                                                                                                                                                                                                                                                                                                                                           |                                                                  |                                                                         |                    |                      |                                                                         |  |                |       |                                                           |  |              |      |                           |  |           |   |                                |  |                         |     |                             |  |        |   |    |  |       |      |    |  |        |     |    |  |          |    |    |  |             |      |    |  |              |    |    |  |           |      |    |  |     |       |    |  |         |       |    |  |  |
| Internal validation 1      | <table border="1"> <tr> <td>Conformal coverage</td> <td>0.79</td> <td>na</td> <td>Internal validation method and statistics for internal cross-validation</td> </tr> <tr> <td>Conformal accuracy</td> <td>0.81</td> <td>na</td> <td></td> </tr> </table>                                                                                                                                                                                                                                                                                                                                                                                                                                                                                                                                                                                                                                                                                                                                                                                                          | Conformal coverage                                                      | 0.79                                                                                                                                                                                                                                                                                                                                                                                                                                                                                                                                                                                      | na                                                               | Internal validation method and statistics for internal cross-validation | Conformal accuracy | 0.81                 | na                                                                      |  |                |       |                                                           |  |              |      |                           |  |           |   |                                |  |                         |     |                             |  |        |   |    |  |       |      |    |  |        |     |    |  |          |    |    |  |             |      |    |  |              |    |    |  |           |      |    |  |     |       |    |  |         |       |    |  |  |
| Conformal coverage         | 0.79                                                                                                                                                                                                                                                                                                                                                                                                                                                                                                                                                                                                                                                                                                                                                                                                                                                                                                                                                                                                                                                              | na                                                                      | Internal validation method and statistics for internal cross-validation                                                                                                                                                                                                                                                                                                                                                                                                                                                                                                                   |                                                                  |                                                                         |                    |                      |                                                                         |  |                |       |                                                           |  |              |      |                           |  |           |   |                                |  |                         |     |                             |  |        |   |    |  |       |      |    |  |        |     |    |  |          |    |    |  |             |      |    |  |              |    |    |  |           |      |    |  |     |       |    |  |         |       |    |  |  |
| Conformal accuracy         | 0.81                                                                                                                                                                                                                                                                                                                                                                                                                                                                                                                                                                                                                                                                                                                                                                                                                                                                                                                                                                                                                                                              | na                                                                      |                                                                                                                                                                                                                                                                                                                                                                                                                                                                                                                                                                                           |                                                                  |                                                                         |                    |                      |                                                                         |  |                |       |                                                           |  |              |      |                           |  |           |   |                                |  |                         |     |                             |  |        |   |    |  |       |      |    |  |        |     |    |  |          |    |    |  |             |      |    |  |              |    |    |  |           |      |    |  |     |       |    |  |         |       |    |  |  |
| Internal validation 2      |                                                                                                                                                                                                                                                                                                                                                                                                                                                                                                                                                                                                                                                                                                                                                                                                                                                                                                                                                                                                                                                                   |                                                                         | Additional validation settings and statistics for internal cross-validation                                                                                                                                                                                                                                                                                                                                                                                                                                                                                                               |                                                                  |                                                                         |                    |                      |                                                                         |  |                |       |                                                           |  |              |      |                           |  |           |   |                                |  |                         |     |                             |  |        |   |    |  |       |      |    |  |        |     |    |  |          |    |    |  |             |      |    |  |              |    |    |  |           |      |    |  |     |       |    |  |         |       |    |  |  |
| External validation        |                                                                                                                                                                                                                                                                                                                                                                                                                                                                                                                                                                                                                                                                                                                                                                                                                                                                                                                                                                                                                                                                   |                                                                         | External validation statistics                                                                                                                                                                                                                                                                                                                                                                                                                                                                                                                                                            |                                                                  |                                                                         |                    |                      |                                                                         |  |                |       |                                                           |  |              |      |                           |  |           |   |                                |  |                         |     |                             |  |        |   |    |  |       |      |    |  |        |     |    |  |          |    |    |  |             |      |    |  |              |    |    |  |           |      |    |  |     |       |    |  |         |       |    |  |  |
| Comments                   |                                                                                                                                                                                                                                                                                                                                                                                                                                                                                                                                                                                                                                                                                                                                                                                                                                                                                                                                                                                                                                                                   |                                                                         | Additional comments on model building                                                                                                                                                                                                                                                                                                                                                                                                                                                                                                                                                     |                                                                  |                                                                         |                    |                      |                                                                         |  |                |       |                                                           |  |              |      |                           |  |           |   |                                |  |                         |     |                             |  |        |   |    |  |       |      |    |  |        |     |    |  |          |    |    |  |             |      |    |  |              |    |    |  |           |      |    |  |     |       |    |  |         |       |    |  |  |

## Other information

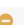[Edit](#)

|                                       | Value | Description                                                                                          |
|---------------------------------------|-------|------------------------------------------------------------------------------------------------------|
| Other related models                  |       | Related models                                                                                       |
| Date of QMRF                          |       | Date of QMRF, usually is the same as the model creation                                              |
| Date of QMRF updates                  |       | Dates of document updates                                                                            |
| QMRF updates                          |       | Update of the QMRF                                                                                   |
| References                            |       | Reference(s) to main scientific papers and/or software package                                       |
| QMRF same models                      |       | Availability of another QMRF for exactly the same model                                              |
| Comment on the endpoint               |       | Additional comments on the modeled endpoint                                                          |
| Endpoint data quality and variability |       | Text field containing all the information for adequately judge the quality of the experimental data. |
| Descriptor selection                  |       | Detailed information about descriptor selection process                                              |
